# Supplementary material
Source: PubMed Central journal article supplement (PMC3369288)
Supplement: mt201259x2.pdf [file mt201259x2.pdf]

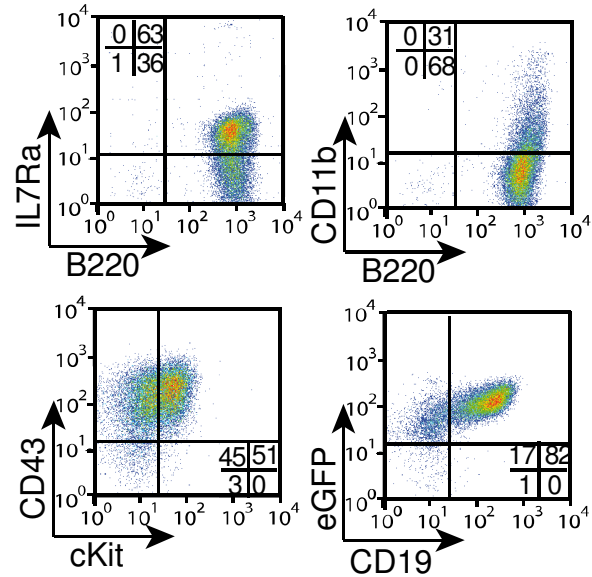

### Supplementary Figure 2: Leukemia phenotype in secondary recipients

BM cells of a secondary recipient was analysed for the expression of cell surface markers as indicated. Leukemic cells retained their B-cell phenotype (B220, CD43) and were more strongly positive for CD19, IL7Ra and cKit. Similar to the leukemic cells of the primary mouse we found a B220 and CD11b double positive cell population.
