# Supplementary material
Source: PubMed Central journal article supplement (PMC3369288)
Supplement: mt201259x3.pdf [file mt201259x3.pdf]

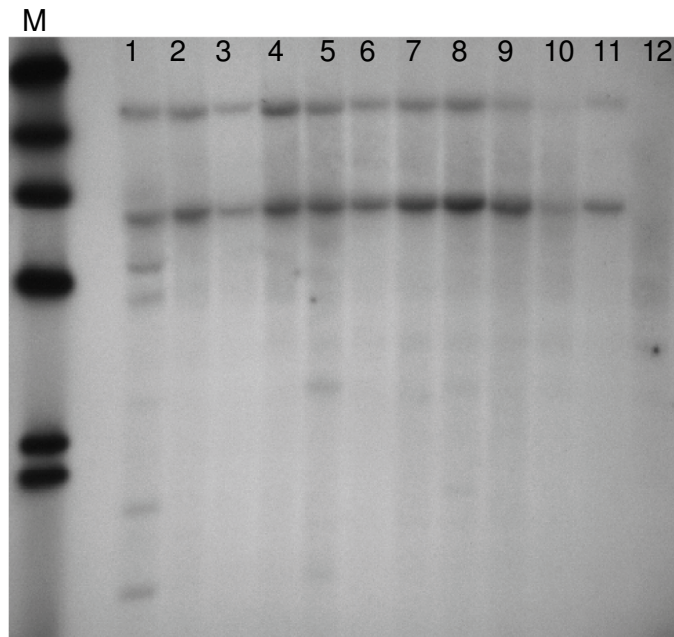

### Supplementary Figure 3: Southern blot analysis of DNA isolated from different tissues and mice

Genomic DNA isolated from cells of different tissues of leukemic mice was digested with BamHI and the vector specific signals detected with a 607 bp fragment of the wPRE element as probe. Two distinct bands were detected in all samples indicating that there was a single clone with two vector insertions that seeded the leukemia in the secondary recipients. Only in lane one additional weaker bands could be detected which can be explained by other genetically modified cells that were contained in the spleen of the primary recipient mouse as the spleen is a primary hematopoietic organ in the mouse.

Lanes: 1) primary mouse, spleen, 2) primary mouse, liver, 3) primary mouse, peripheral blood, 4) secondary mouse one, bone marrow, 5) secondary mouse one, spleen, 6) secondary mouse one, liver, 7) secondary mouse two, bone marrow, 8) secondary mouse two, spleen, 9) secondary mouse two, liver, 10) secondary mouse two, thymus, 11) secondary mouse two, peripheral blood, 12) control DNA from the spleen of a mock mouse C57Bl/6. M= marker (Lambda-DNA, HindIII digested, Invitrogen).
