# Supplementary material
Source: PubMed Central journal article supplement (PMC3369288)
Supplement: mt201259x4.pdf [file mt201259x4.pdf]

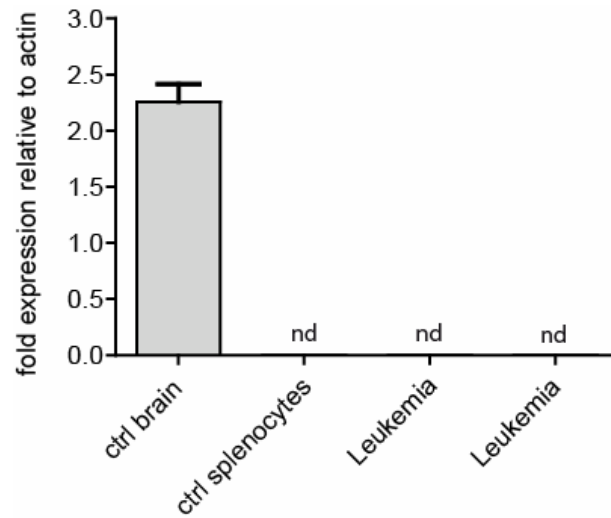

**Supplementary Figure 4: Expression of Nance-Horan-Syndrome (Nhs) mRNA in leukemic cells**

As one of the two vector insertions in the leukemia was detected close to the *Nhs* gene, qRT-PCR was performed to detect the expression of Nhs in leukemic cells. No Nhs message could be detected in leukemic cells or control splenocytes, as Nhs is not expressed in hematopoietic tissues. As positive control to demonstrate the performance of the PCR, RNA was isolated from mouse brain and Nhs expression could clearly be detected. (Expression levels are shown relative to Actin beta expression.)
