# Supplementary material
Source: PubMed Central journal article supplement (PMC3369288)
Supplement: mt201259x5.pdf [file mt201259x5.pdf]

**Supplementary Figure 5: Splice products that would result in a truncated EBF1 protein**

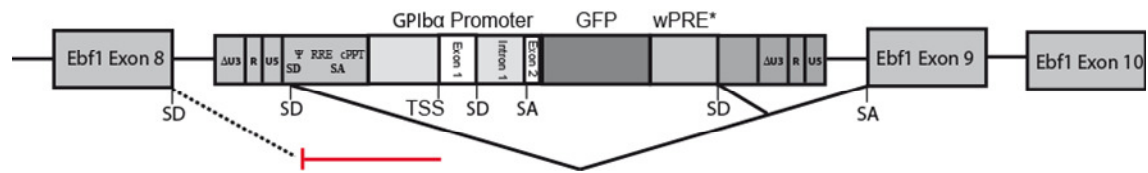

Splicing from the vector encoded splice donor (SD) to the splice acceptor (SA) of Ebf1 exon 9 impairs the physiological splicing from exon 8 to exon 9 leading to a readthrough after Ebf1 exon 8. Translation of this RNA will be terminated at a stop codon in intron 8.

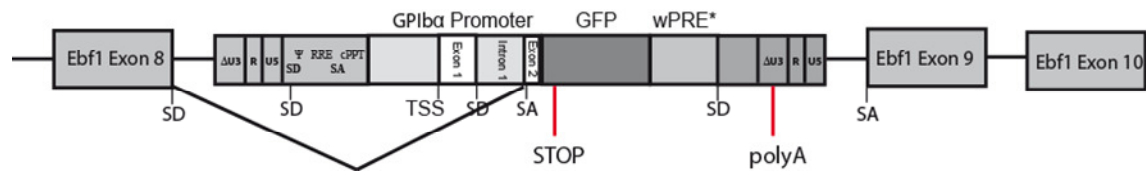

Splicing from the Ebf1 exon 8 SD to the SA in the GPIIbα promoter fragment results in a fusion transcript. The generated transcript will be polyadenylated at the polyA in the 3'LTR. Translation will be terminated at a stop codon in the eGFP cDNA.

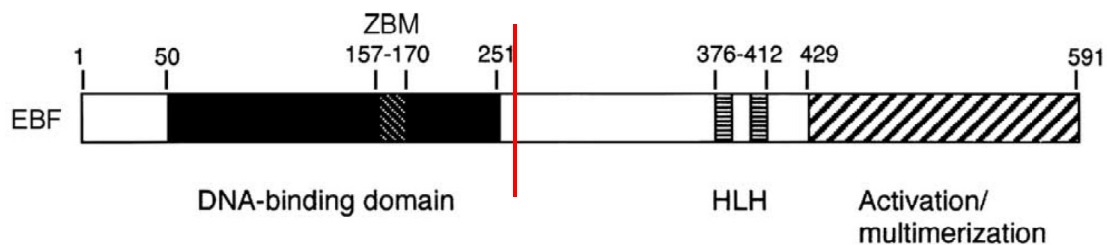

Both transcripts would code for a truncated Ebf1 protein that is terminated after the DNA-binding domain.
