# Supplementary material
Source: PubMed Central journal article supplement (PMC3369288)
Supplement: mt201259x6.pdf [file mt201259x6.pdf]

## Supplementary Figure 6

Verification of transcript 1: Sequencing results and alignment of the PCR product (PCR\_SEQ) amplified by the primers Ebf1 Exon 7 fw and Ebf1 intron 8 rev. Sequencing verifies the readthrough into the intron 8.

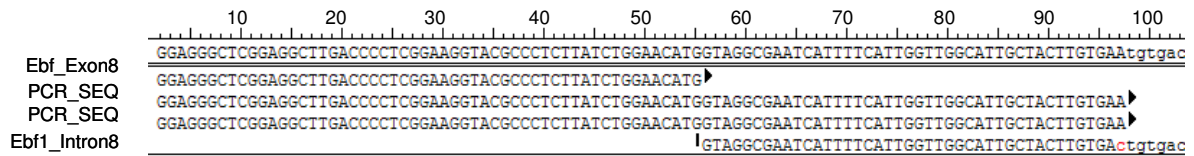

Verification of transcript 2: Sequencing results and alignment of the PCR product (PCR\_SEQ) obtained with the primers Ebf1\_ Exon7\_ fw and EGFP\_ rev, EGFP sequence (EGFP) and Ebf1 exon 8 sequence (Ebf1\_ Exon8). Sequencing verifies splicing from Ebf1 exon 8 to the GPIbaP encoded splice acceptor.

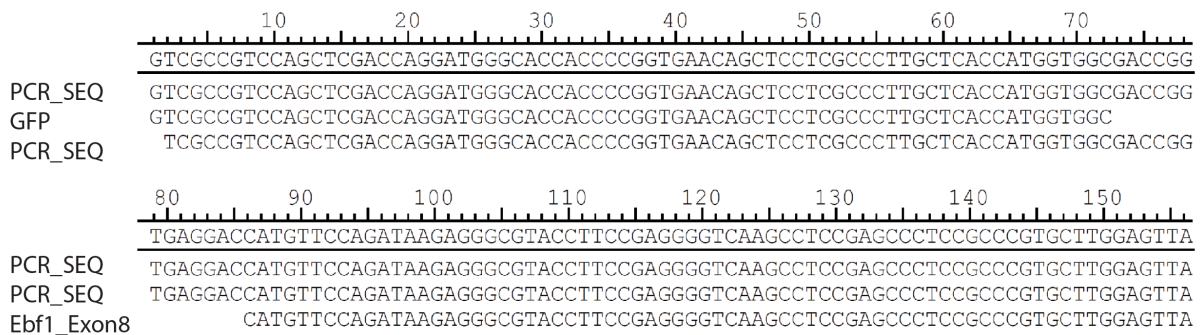

Verification of transcript 3: Sequencing results and alignment of the PCR product (PCR\_SEQ) obtained with the primers HIV\_SD\_ fw and Ebf1\_ Exon9\_ rev, HIV splice donor upstream sequence (HIV\_SD) and Ebf1 exon 9 sequence (Ebf1\_ Exon9). Sequencing verifies splicing from the HIV splice donor to Ebf1 exon 9. Red letters indicate mismatches.

```

      10      20      30      40      50      60      70
      |-----|-----|-----|-----|-----|-----|
      TGCAGGACTCGGCTTGCTGAAGCGCGCACGGCAAGAGGCGAGGGCGGCGACTGCTACTCCCTGTATCAAAGCCATC
PCR_SEQ  TGCAGGACTCGGCTTGCTGAAGCGCGCACGGCAAGAGGCGAGGGCGGCGACTGCTACTCCCTGTATCAAAGCCATC
HIV_SD   GCAGGACTCGGCTTGCTGAAGCGCGCACGGCAAGAGGCGAGGGCGGCGACTG
Ebf1_Exon9                                     CTACTCCCTGTATCAAAGCCATC

      80      90      100     110     120     130     140     150
      |-----|-----|-----|-----|-----|-----|
      AGCCCGAGTGAAGGATGGACGACGGGAGGCGCGACcTGTGATCATCATAGGGGACAATTTCTTTGAnTGGGTTACAG
PCR_SEQ  AGCCCGAGTGAAGGATGGACGACGGGAGGCGCGACCTGTGATCATCATAGGGGACAATTTCTTTGANTGGGTTACAG
Ebf1_Exon9 AGCCCGAGTGAAGGATGGACGACGGGAGGCGCGAC-TGTGATCATCATAGGGGACAATTTCTTTGA-TGGGTTACAG

```

Verification of transcript 4: Sequencing results and alignment of the PCR product (PCR\_SEQ) obtained with the primers GPIbaP\_SD\_fw and Ebf1\_Exon9\_rev, GPIbaP exon 1 sequence (GPIbaP Exon1) and Ebf1 exon 9 sequence (Ebf1\_Exon9). Sequencing verifies splicing from the GPIbaP encoded splice donor to Ebf1 exon 9. Red letters indicate mismatches.

```

      10      20      30      40      50      60      70
      |-----|-----|-----|-----|-----|-----|
      CTCACTCCAGACCAGCATGGTACCGAATATGACCTgGTAACCCATCAAAGnAAATTGnTCCCCcTATGtATGgAT
Ebf1_Exon9 CTCACTCCAGACCAGCATGGTACCGAATATGACCT-GTAACCCATCAAAG-AAATTG-TCCCC-TATG-ATG-AT
PCR_SEQ      TATGACCTGGTAACCCATCAAAGNAAATTGNTCCCCCTATGTATGGAT

      80      90      100     110     120     130     140     150
      |-----|-----|-----|-----|-----|-----|
      CACAGcTCGgCGCC-TcCCG-TCG-TCCATCCTTCACTCGGG-CTGATGGCTTTGATACAGGG-AGTAGAGGCAG
Ebf1_Exon9 CACAG-TCG-CGCC-TCCCG-TCG-TCCATCCTTCACTCGGG-CTGATGGCTTTGATACAGGG-AGTAG
PCR_SEQ  CACAGCTCGGCGCCGTCCCGNTCGATNCATCCTTCACTCGGGCCTGATGGCTTTGATACAGGGCAGTAGAGGCAG
PCR_SEQ      AC-T-CCG-TCG-TCCATCCTTCACTCGGG-CTGATGGCTTTGATACAGGG-AGTAGAGGCAG
GPIbaP Exon1                                     AGGCAG

      160     170     180     190     200     210
      |-----|-----|-----|-----|-----|
      GCAGAAAGACCTCCGAAGGCACAGAGCGTCATCTAGGGTGCCACTCGACTCCGTCCCTTCTCTC
PCR_SEQ  GCAGAAAGACCTCCGAAGGCACAGAGCGTCA
PCR_SEQ  GCAGAAAGACCTCCGAAGGCACAGAGCGTCA
GPIbaP Exon1 GCAGAAAGACCTCCGAAGGCACAGAGCGTCTTCTAGGGTGCCACTCGACTCCGTCCCTTCTCTC

```

Verification of transcript 5: Sequencing results and alignment of the PCR product (PCR\_SEQ) obtained with the primers PRE\_fw and Ebf1\_Exon9\_rev, PRE sequence (PRE) and Ebf1 exon 9 sequence (Ebf1\_Exon9). Sequencing verifies splicing from the PRE splice donor to Ebf1 exon 9. Red letters indicate mismatches.

```

      10      20      30      40      50      60      70
CATCGCCGCCTGCCTTGCCCGCTGCTGGACAGGGGCTAGGTTGCTGGGCACAGATAAATCCGTGGTGTGTGTCG
PCR_SEQ
PRE
      80      90      100     110     120     130     140
GGGAAGCTGACGTCCTTTCGAATTCGATATCAGCSTACCTACTCCCTGTATCAAAGCCATCAGCCCGAGTGAAG
PCR_SEQ
PRE
Ebf1_Exon9
      150     160     170     180     190
GATGGACGACGGGAGGCGCGACTGTSATCATCATAGGGGACAATTTCTTTG
PCR_SEQ
Ebf1_Exon9
GATGGACGACGGGAGGCGCGACTGTCATCATCANAGNGGACAATTTCT
GATGGACGACGGGAGGCGCGACTGTGATCATCATAGGGGACAATTTCTTTG

```

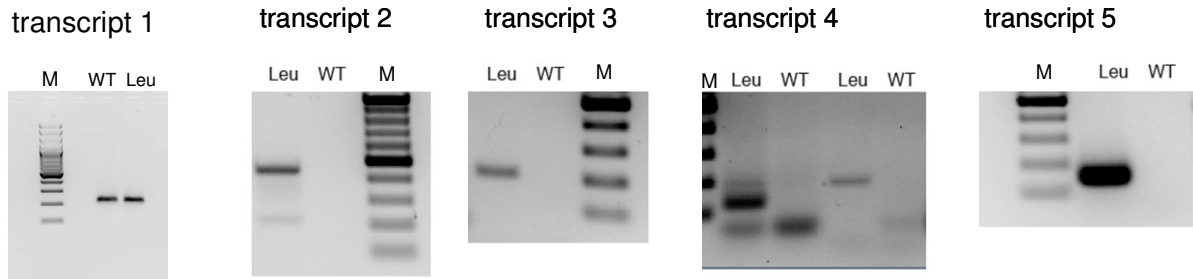

PCR fragments were analysed by gel electrophoreses. Only the transcript 1 could also be well amplified in wildtype progenitor B-cells. M= 100 bp plus marker (Fermentas).
