# Supplementary material
Source: PubMed Central journal article supplement (PMC3369288)
Supplement: mt201259x7.pdf [file mt201259x7.pdf]

## Supplementary Figure 7

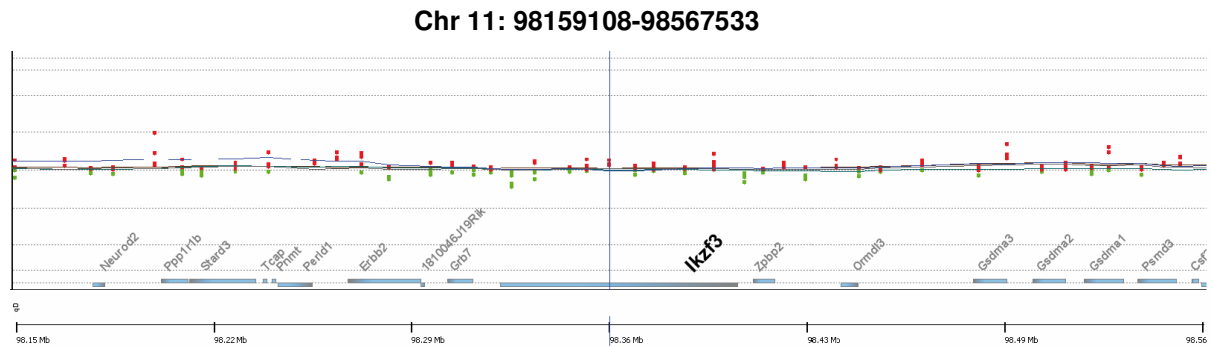

Chromosomal region 11 from 98.159- 98.567 Mb containing the *Ikzf3* gene shows an unaltered copy number status of 2n. Downregulation of *Ikzf3* was therefore unlikely to be caused by deletions.
