# Supplementary material
Source: PubMed Central journal article supplement (PMC3369288)
Supplement: mt201259x8.pdf [file mt201259x8.pdf]

**Supplementary Table 1: Position of the lentiviral insertion sites**

| <b>Chromosome</b> | <b>Gene ID</b> | <b>Gene Symbol</b> | <b>Distance from TSS (bp)</b> | <b>Rel. Orientation</b> | <b>Description</b>    |
|-------------------|----------------|--------------------|-------------------------------|-------------------------|-----------------------|
| XF4               | 95727          | Nhs                | 268771, intron 1              | forward                 | Nance-Horan syndrome  |
| 11 B1.1           | 13591          | Ebf1               | 277589, intron 8              | forward                 | Early B-cell factor 1 |

TSS= transcriptional start site
