# Supplementary material
Source: PubMed Central journal article supplement (PMC3369288)
Supplement: mt201259x9.pdf [file mt201259x9.pdf]

| <b>Supplementary Table 2: Primer</b> |                          |                                                                                              |
|--------------------------------------|--------------------------|----------------------------------------------------------------------------------------------|
| <b>Primer sequence (5'&gt;3')</b>    | <b>Abreviation</b>       | <b>Employed for</b>                                                                          |
| GCA GGA CTC GGC TTG CTG AAG          | HIV SD fw                | Detection of splicing from the HIV SD to Ebf1 Exon 9                                         |
| GAC GCT CTG TGC CTT CGG AGG          | GP1baP SD fw             | Detection of splicing from GP1baP Intron 1 SD to Ebf1-exon9                                  |
| CCC ATC AAA gAA ATT gTC CCC          | Ebf1 Exon 9 rev          | Detection of Splicing to Exon9                                                               |
| CGG ATG GCA TGA GGA GTT ATC          | Ebf1 Exon10 rev          | Detection of Splicing to Exon9                                                               |
| GCA CTG ATA ATT CCG TGG TGT TG       | Pre# fw                  | Detection of Splicing from PRE SD                                                            |
| TGC AGG AAA CCC ACG TGA C            | Ebf1 Exon7 fw            | Detection of Splicing from Ebf1 Exon8 to GP1ba SA<br>qRT-PCR: Ebf1-readthrough in Intron 8   |
| TGA ACA GCT CCT CGC CCT TG           | GFP_rev                  | Detection of Splicing from Ebf1 Exon8 to GP1ba SA                                            |
| TCA CAA GTA GCA ATG CCA ACC          | Ebf1 Intron 8 rev        | qRT-PCR: Ebf1-readthrough in Intron 8                                                        |
| TCG GAA GGT ACG CCC TCT TA           | Ebf1-GFP Fusion qPCR fw  | qRT-PCR: Ebf1-exon8 fusion to GP1baP SA                                                      |
| GCT GAA CTT GTG GCC GTT TA           | Ebf1-GFP Fusion qPCR rev | Detection of Splicing from Ebf1 Exon8 to GP1ba SA<br>qRT-PCR: Ebf1-exon8 fusion to GP1baP SA |
| AAA AGC TGT GGC AAC CGA AA           | Ebf1fw                   | qRT-PCR: Ebf1                                                                                |
| TGC ATT TAA GGA AAA ACT TCA GGAA     | Ebf1rev                  | qRT-PCR: Ebf1                                                                                |
| GCC ACC CTG TGT AGA AGA GC           | Nhs_fw                   | qRT-PCR: Nhs                                                                                 |
| GGT AGG CTG GTA GTG GTG GA           | Nhs_rev                  | qRT-PCR: Nhs                                                                                 |
