# Supplementary material
Source: PubMed Central journal article supplement (PMC3369288)
Supplement: mt201259x10.pdf [file mt201259x10.pdf]

## Supplementary Materials and Methods

### Methods:

#### Quantitative PCR

RT-PCR was performed for 40 cycles followed by gel electrophoresis 2% agarose gels. Primers are indicated in Supplementary Table 1. Primers for detection of Ebf1 and Actin-beta have been obtained from Qiagen (Qiagen GmbH, Hilden, Germany).

| Primer sequence (5'>3')           | Abreviation              | Employed for                                                |
|-----------------------------------|--------------------------|-------------------------------------------------------------|
| GCA GGA CTC GGC TTG CTG AAG       | HIV SD fw                | Detection of splicing from the HIV SD to Ebf1 Exon 9        |
| GAC GCT CTG TGC CTT CGG AGG       | GP1baP SD fw             | Detection of splicing from GP1baP Intron 1 SD to Ebf1-exon9 |
| CCC ATC AAA gAA ATT gTC CCC       | Ebf1 Exon 9 rev          | Detection of Splicing to Exon9                              |
| CGG ATG GCA TGA GGA GTT ATC       | Ebf1 Exon10 rev          | Detection of Splicing to Exon9                              |
| GCA CTG ATA ATT CCG TGG TGT TG    | Pre# fw                  | Detection of Splicing from PRE SD                           |
| TGC AGG AAA CCC ACG TGA C         | Ebf1 Exon7 fw            | Detection of Splicing from Ebf1 Exon8 to GP1ba SA           |
| TGA ACA GCT CCT CGC CCT TG        | GFP_rev                  | qRT-PCR: Ebf1-readthrough in Intron 8                       |
| TCA CAA GTA GCA ATG CCA ACC       | Ebf1 Intron 8 rev        | Detection of Splicing from Ebf1 Exon8 to GP1ba SA           |
| TGG GAA GGT ACG CCC TCT TA        | Ebf1-GFP Fusion qPCR fw  | qRT-PCR: Ebf1-readthrough in Intron 8                       |
| GCT GAA CTT GTG GCC GTT TA        | Ebf1-GFP Fusion qPCR rev | qRT-PCR: Ebf1-exon8 fusion to GP1baP SA                     |
| AAA AGC TGT GGC AAC CGA AA        | Ebf1fw                   | qRT-PCR: Ebf1-exon8 fusion to GP1baP SA                     |
| TGC ATT TAA GGA AAA ACT TCA GGA A | Ebf1rev                  | qRT-PCR: Ebf1                                               |
| GCC ACC CTG TGT AGA AGA GC        | Nhs_fw                   | qRT-PCR: Nhs                                                |
| GGT AGG CTG GTA GTG GTG GA        | Nhs_rev                  | qRT-PCR: Nhs                                                |

#### LM-PCR

Lentiviral vector integrations in leukemic cells were analyzed by ligation-mediated (LM) PCR, as previously described<sup>1, 2</sup>. Here, genomic DNA was isolated from total bone marrow cells with the QIAamp DNA Blood Mini Kit (QIAGEN). 500ng DNA were used for restriction digest with Tsp509I (New England Biolabs). For primer extension (95°C 5min; 64°C 30min; 72°C 15min) Native Pfu DNA polymerase (Stratagene) and a 5'-biotinylated primer (lvLTR1 5'-GAACCCACTGCTTAAGCCTCA-3') binding in the LTR were used. Amplified fragments were captured with streptavidin-coated magnetic beads (Invitrogen) and ligated with a linker before running a nested PCR (95°C 2min; 94°C 15sec, 60°C 30sec, 68°C 1min, for 30 cycles; 68°C 10min; lvLTR2 5'-AGCTTGCCTTGAGTGCTTCA-3' and #357 5'-GACCCGGGAGATCTGAATTG -3'; lvLTR3 5'-AGTAGTGTGTGCCCGTCTGT-3' and #358 5'-AGTGGCACAGCAGTTAGGACG-3') using the Extensor High-Fidelity PCR Master Mix (AB gene). Amplified fragments were analyzed by agarose gel electrophoresis; bands were cut out with the QIAquick Gel Extraction Kit (QIAGEN) and sequenced.

**Chromosome preparation and spectral karyotyping (SKY)**

Leukemic cells were short-term cultivated for 2 day followed by chromosome preparation using standard protocols <sup>3</sup>. Spectral karyotyping (SKY) was performed as described previously <sup>3</sup> and according to the manufacturer's instructions (ASI; Applied Spectral Imaging, Ltd., Migdal HaEmek, Israel). Spectral images were acquired using an epifluorescence microscope equipped with an interferometer (SpectraCube™ ASI), a custom-designed optical filter and the SkyView™ software (ASI).

**Comparative genome hybridisation (Array-CGH)**

Array-CGH was performed using the Agilent Mouse Genome Microarray Kit 4x180k (Agilent Technologies, Santa Clara, CA, USA), a high resolution 60-mer oligonucleotide based microarray with median overall probe spacing of about 10 kb. Labelling and hybridization of genomic DNA was performed according to the protocol provided by Agilent. Briefly, 0.75 µg of test DNA were labelled by random priming using the Agilent Genomic DNA Labelling Kit Plus, test DNA with Cy3-dUTP and reference DNA with Cy5-dUTP. Labelled products were purified by Amicon Ultra 30 k filters (Millipore, Billerica, MA, USA), combined and then mixed with mouse Cot-1 DNA (50 µg), Agilent 10X Blocking Agent, and Agilent 2X Hybridization Buffer. This solution was hybridized to Agilent's 4x180k Mouse Genome CGH microarray at 65°C with 20 rpm rotation for 24 h. Washing steps were performed according to the Agilent protocol. Microarray slides were scanned immediately using an Agilent microarray scanner at a resolution of 2 µm. For image analysis, default CGH settings of Feature Extraction Software (Agilent Technologies, Waldbronn, Germany) were applied. Output files from Feature Extraction were subsequently imported into Agilent's CGH data analysis software, DNA-Workbench. The Aberration Algorithm ADM2 was applied and Aberration Filters were set to: threshold 4.0, at least 5 probes with mean log<sub>2</sub> ratio of -0.6

**References**

1. Schmidt, M., Hoffmann, G., Wissler, M., Lemke, N., Mussig, A., Glimm, H., et al. (2001). Detection and direct genomic sequencing of multiple rare unknown flanking DNA in highly complex samples. *Hum Gene Ther* **12**: 743-749.
2. Kustikova, O. S., Modlich, U., and Fehse, B. (2009). Retroviral insertion site analysis in dominant haematopoietic clones. *Methods Mol Biol* **506**: 373-390.
3. Rudolph, C., and Schlegelberger, B. (2009). Spectral karyotyping and fluorescence in situ hybridization of murine cells. *Methods Mol Biol* **506**: 453-466.
